# Supplementary material for: Morphophysiological and Comparative Metabolic Profiling of Purslane Genotypes (Portulaca oleracea L.) under Salt Stress
Source: Biomed Res Int. 2020 Jun 17;2020:4827045. doi: 10.1155/2020/4827045 (PMC7321505; doi:10.1155/2020/4827045)
Supplement: Supplementary Materials — Supplementary Figure S1: (A) “Tall Green” local (“TG”—American origin), (B) a wild variety “Shandong, China” local (“SD”). Supplementary Table S1: metabolites detected by GC-MS from “TG” and “SD” leaves of purslane cultivars at 0, 100, and 200 mM salinity stress. Supplementary Table S2: metabolites detected by GC-MS from “TG” and “SD” roots of purslane cultivars at 0, 100, and 200 mm salinity stress. Supplementary Table S3: Shandong Wild leaves and roots for fold change. Supplementary Table S4: Tall Green leaves and roots for fold change. [file 4827045.f1.zip]

Archive with 10 entries (10 files):
- 4827045.f1/Figure S1.docx
- 4827045.f1/Metabolomic Table S1-leaves.docx
- 4827045.f1/Metabolomic Table S2-roots.doc
- 4827045.f1/SD-leave.pdf
- 4827045.f1/SD-Roots.pdf
- 4827045.f1/Table S3 Shandong Wild leaves and roots for fold change S 4.docx
- 4827045.f1/Table S4 Tall Green leaves and roots leaves and roots for fold change S 3.docx
- 4827045.f1/TG- Tall Green Pathway.docx
- 4827045.f1/TG-leave.pdf
- 4827045.f1/TG-roots.pdf
