# Supplementary figures and images for: Morphophysiological and Comparative Metabolic Profiling of Purslane Genotypes (Portulaca oleracea L.) under Salt Stress
Source: Hindawi journal article supplement (doi:10.1155/2020/4827045), 2020-01-01

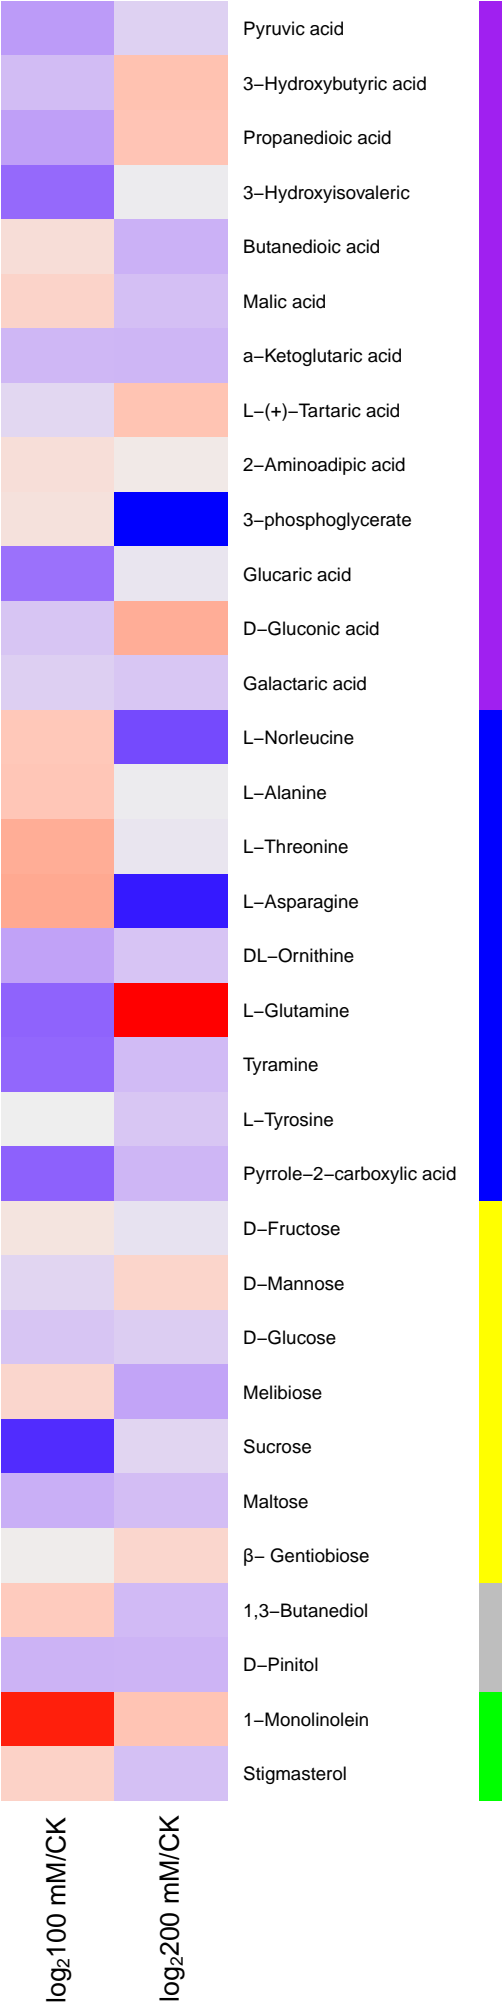

Supplement: f1 [file 4827045.f1.zip]

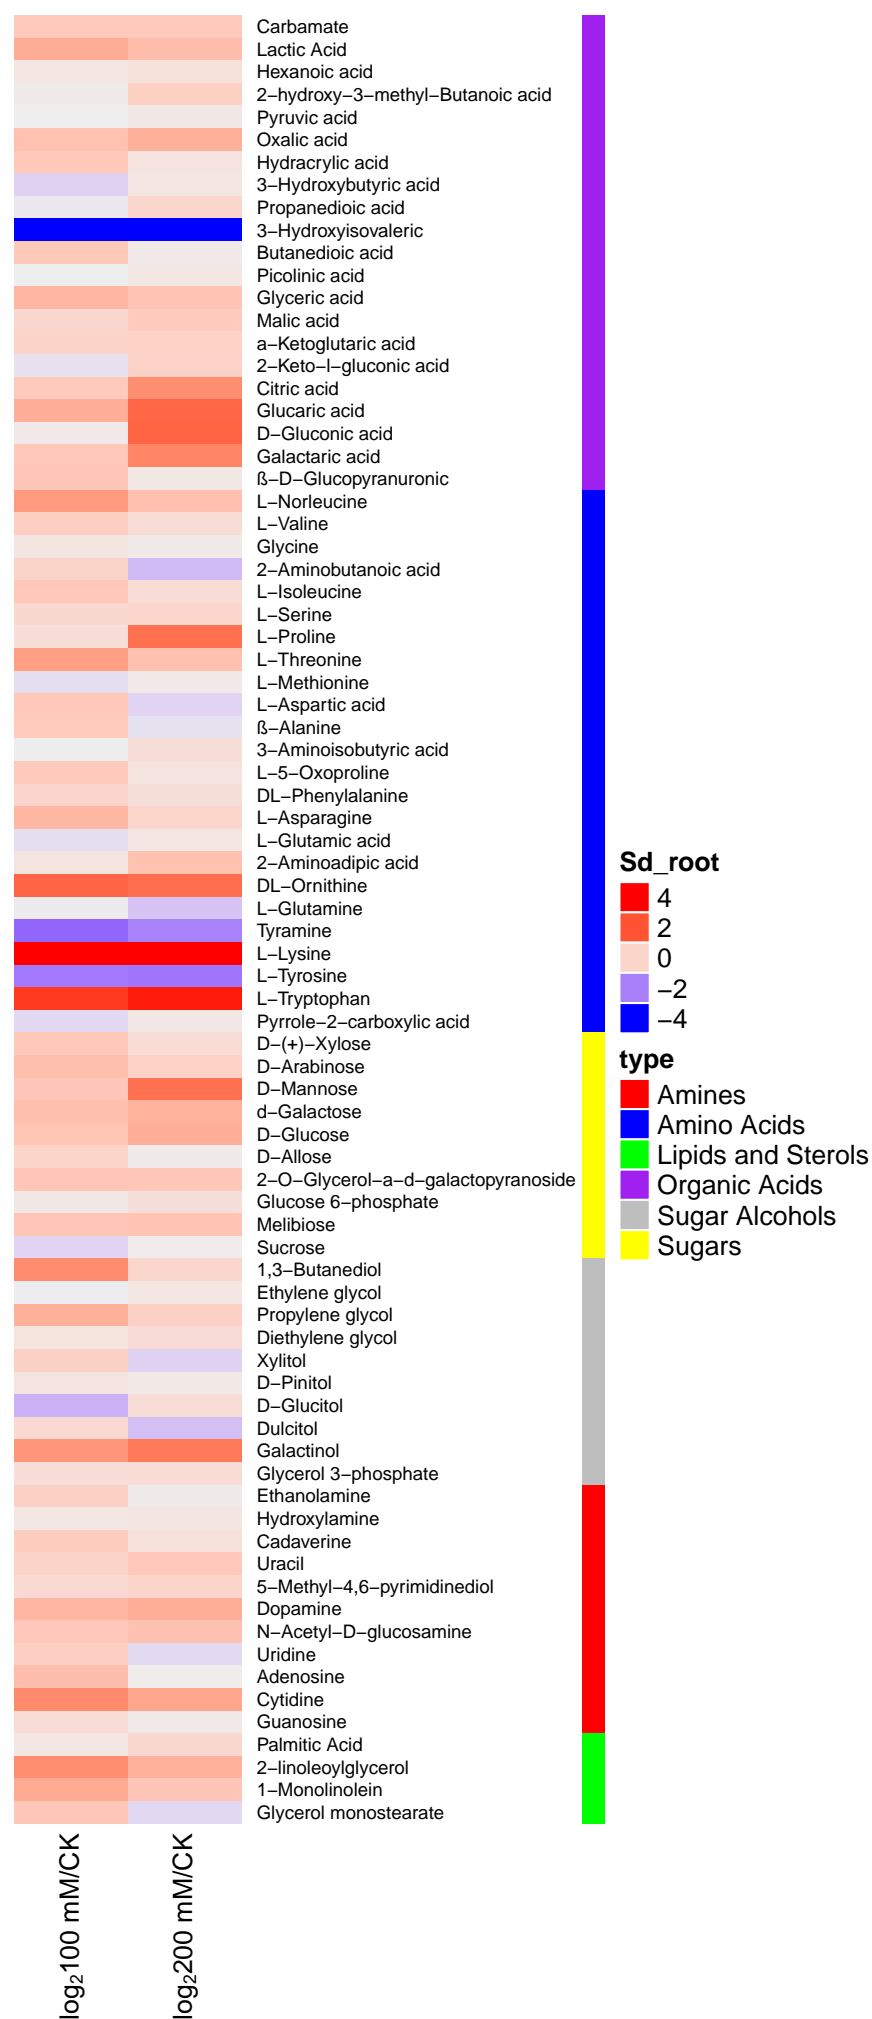

Supplement: f1 [file 4827045.f1.zip]

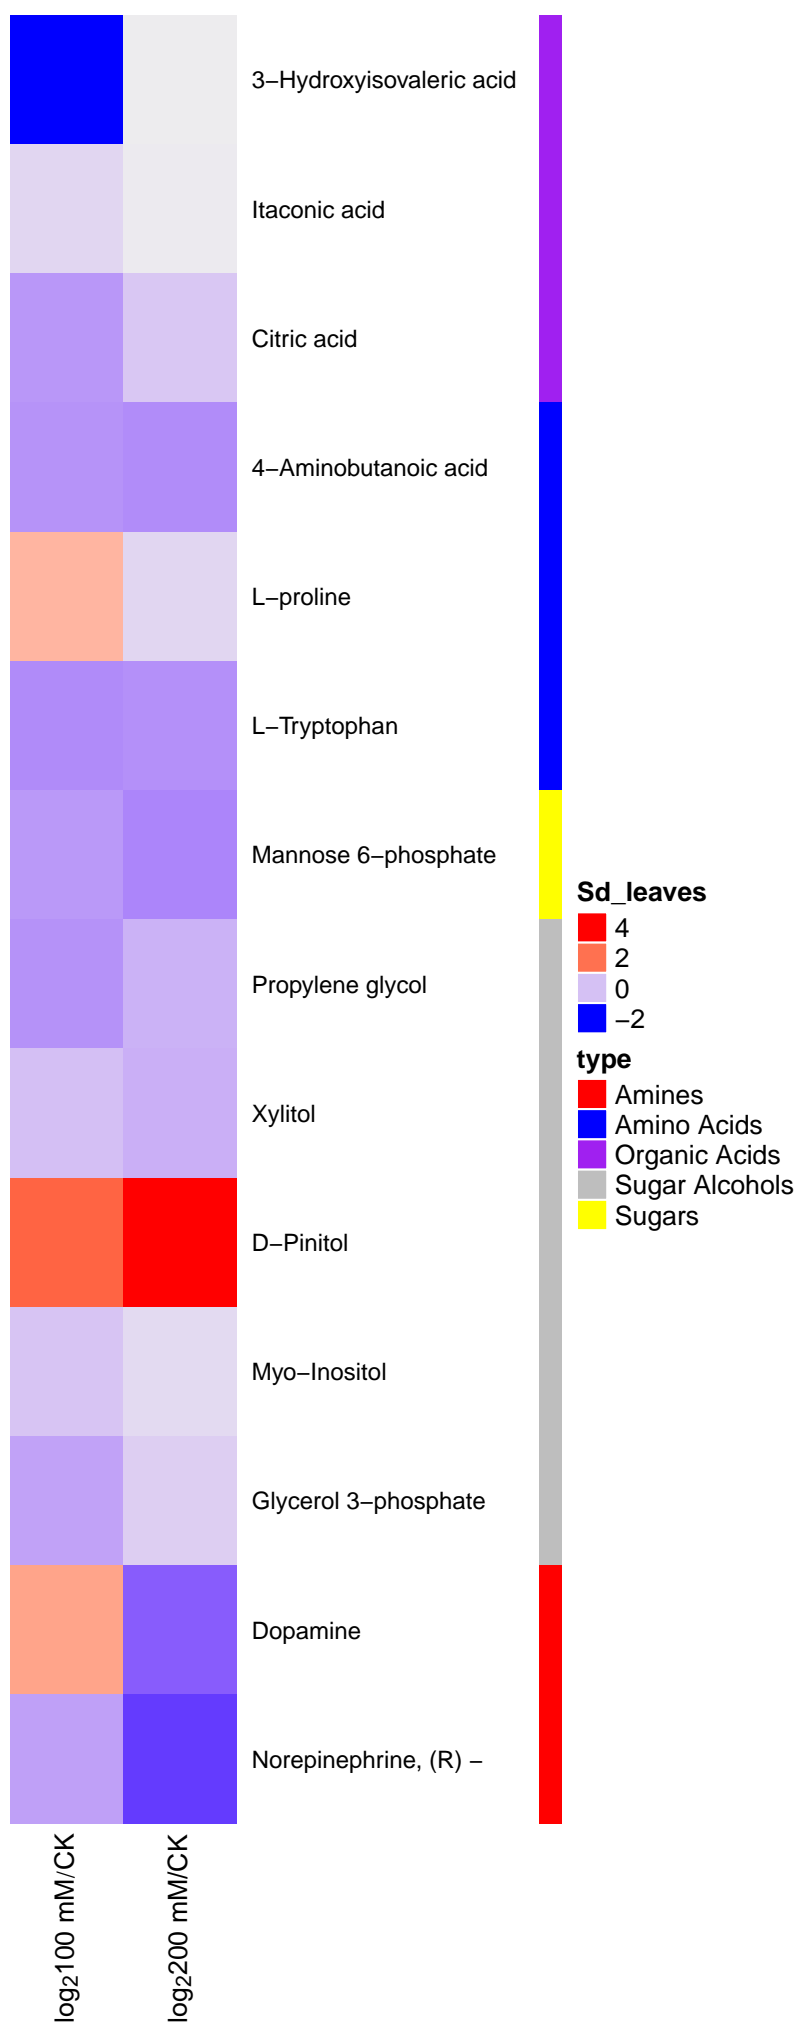

Supplement: f1 [file 4827045.f1.zip]

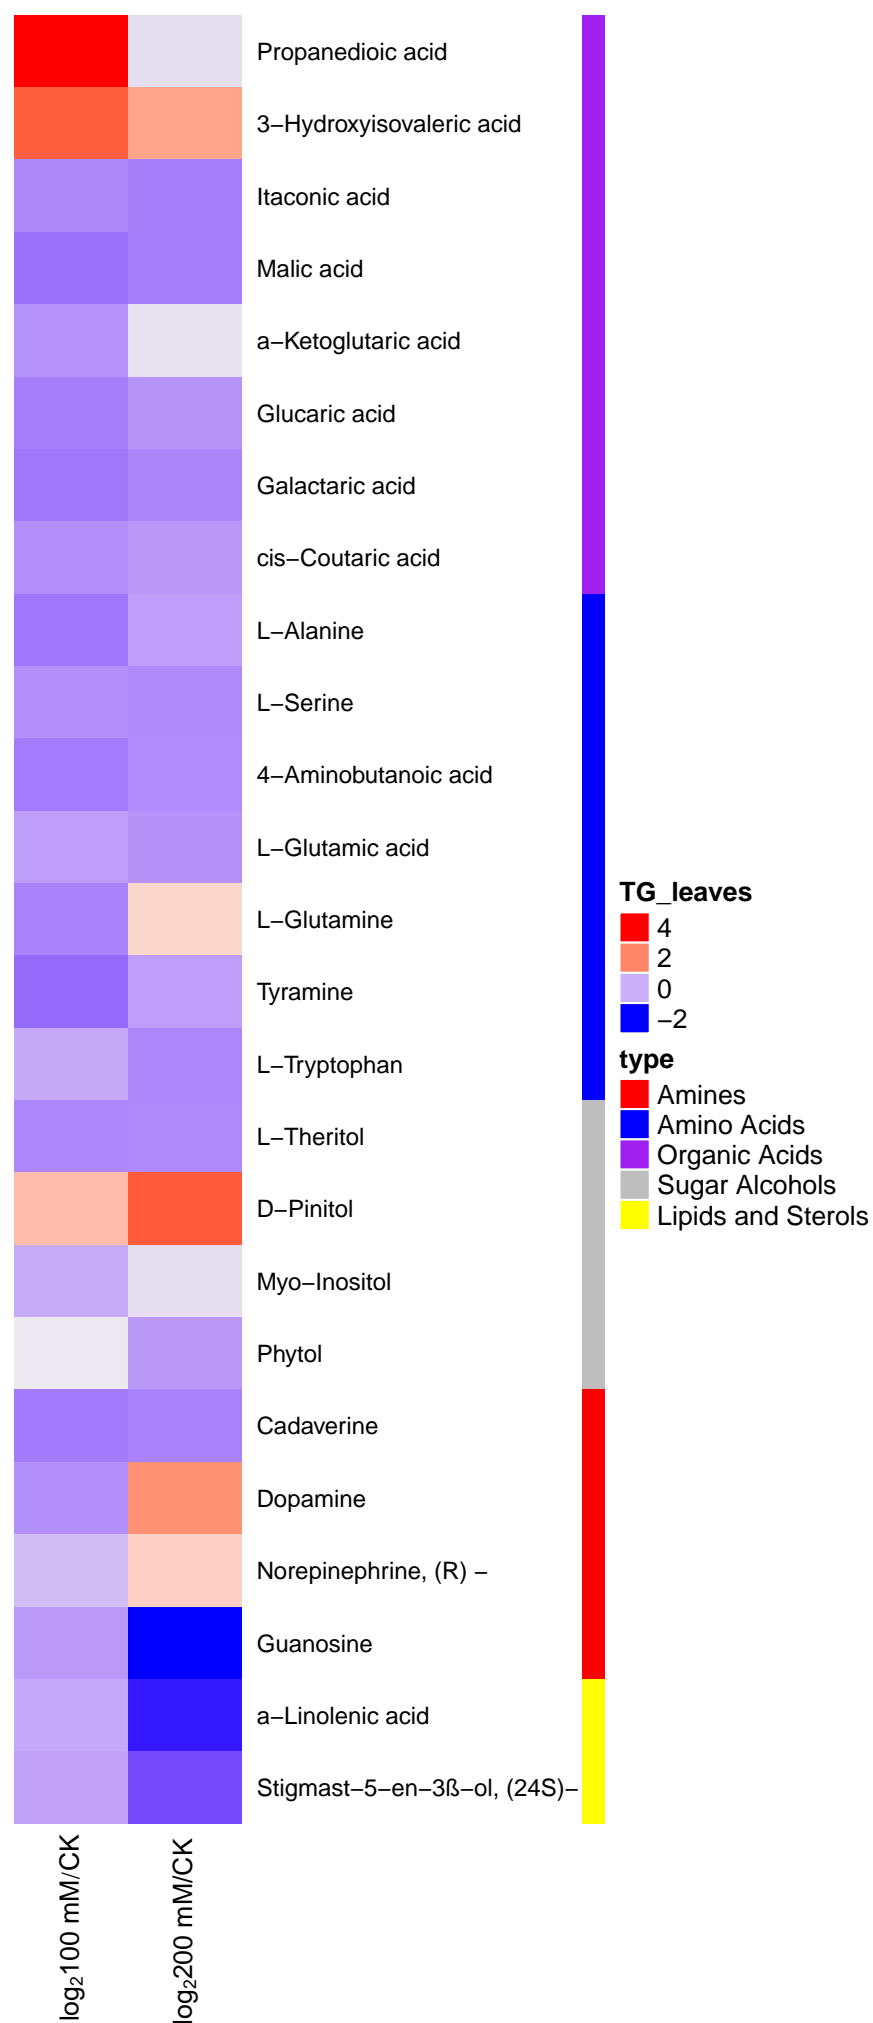

Supplement: f1 [file 4827045.f1.zip]
